# Supplementary material for: Incorporating interpretation uncertainties from deterministic 3D hydrostratigraphic models in groundwater models
Source: Copernicus journal article supplement (doi:10.5194/hess-2023-74), 2023-05-24
Supplement: Supplementary file 1 [file hess-2023-74-supplement.pdf]

## S1. Convergence of predictions

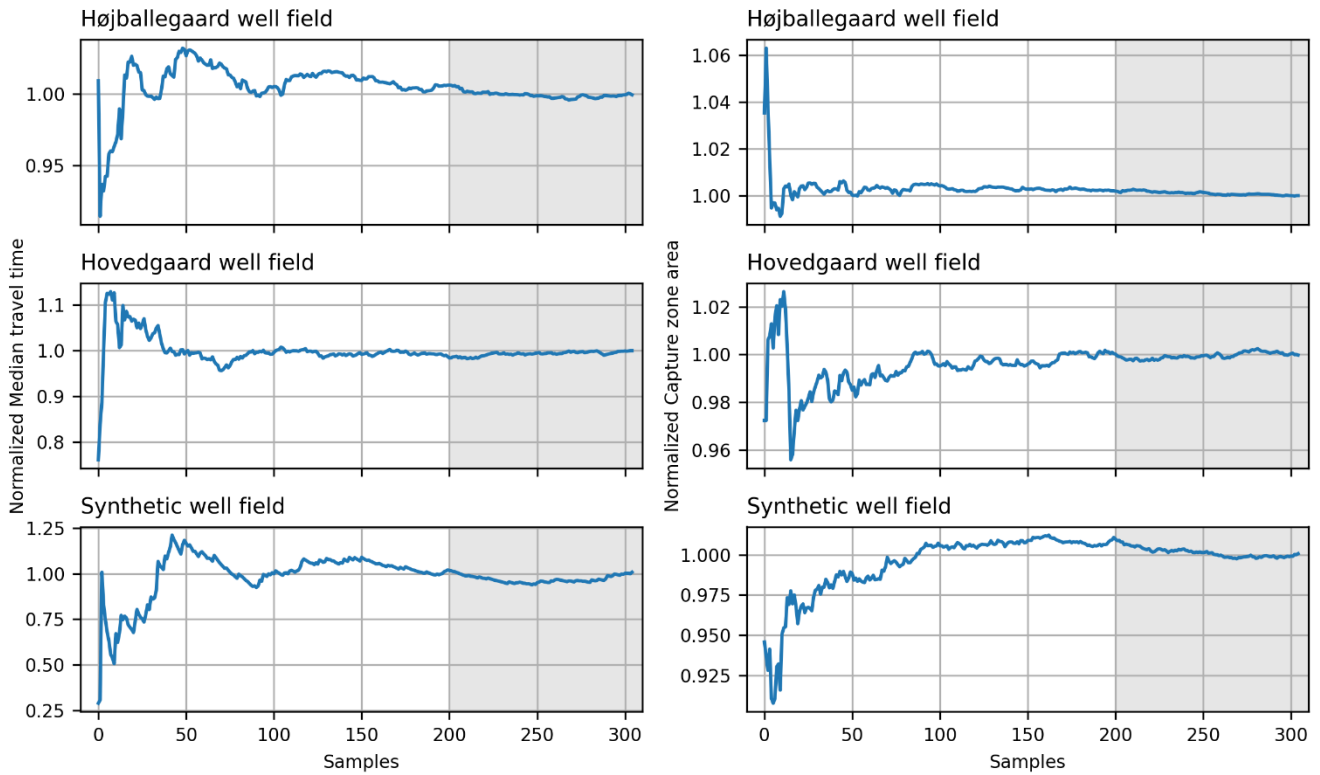

Figure S1: Normalized running mean of predictions recharge area and median travel time across samples of groundwater model parameters applying the manual interpretation model. The predictions are assumed to be converged after 200 samples.

## 5 S2. Posterior parameter distributions Manual Interpretation model

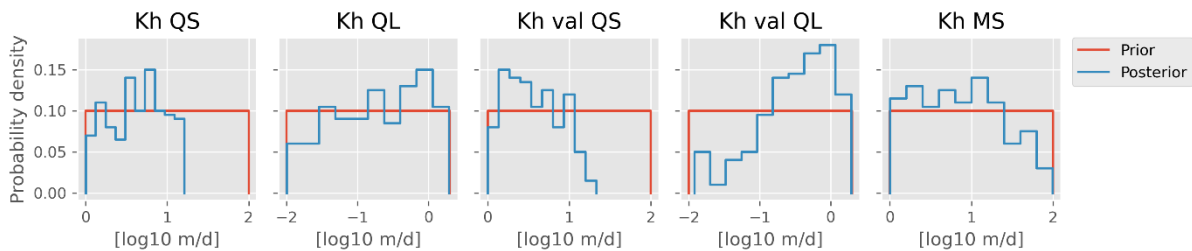

Figure S2: Posterior parameter distributions of the Manual Interpretation model, which is applied in all other geologic realizations.
